# Supplementary material for: Ozone (O 3 ) observations in Saxony, Germany for 1997–2020: Trends, modelling and implications for O 3 control
Source: Copernicus journal article supplement (doi:10.5194/egusphere-2024-4202), 2025-01-24
Supplement: Supplementary file 1 [file egusphere-2024-4202-supplement.pdf]

## Supplement of

# Ozone (O<sub>3</sub>) observations in Saxony, Germany for 1997 - 2020: Trends, modelling and implications for O<sub>3</sub> control

Yaru Wang<sup>1</sup>, Dominik van Pinxteren<sup>1</sup>, Andreas Tilgner<sup>1</sup>, Erik Hans Hoffmann<sup>1</sup>, Max Hell<sup>1</sup>, Susanne Bastian<sup>2</sup>, Hartmut Herrmann<sup>1\*</sup>

<sup>1</sup>Atmospheric Chemistry Department (ACD), Leibniz Institute for Tropospheric Research (TROPOS), Permoserstr. 15, Leipzig, 04318, Germany

<sup>2</sup>Saxon State Office for the Environment, Agriculture, and Geology (LfULG), Pillnitzer Platz 3, Dresden Pillnitz, 01326, Germany

Correspondence to: Hartmut Herrmann (herrmann@tropos.de)

**Table S1. Data availability and proportion of missing data of hourly concentrations of ozone in the Saxony air quality measurement network used in the project.**

| Station           | Station type | Begin time       | End time         | Years | Missing values / % |
|-------------------|--------------|------------------|------------------|-------|--------------------|
| DD-Nord           | Traffic      | 01.01.1997 00:00 | 31.12.2020 23:00 | 24    | 3.2                |
| Annaberg          | Urban        | 02.01.1997 00:00 | 31.12.2020 23:00 | 24    | 2.3                |
| Bautzen           | Urban        | 01.01.2005 00:00 | 31.12.2020 23:00 | 16    | 0.9                |
| DD-Winkelmannstr. | Urban        | 19.06.2008 23:00 | 31.12.2020 23:00 | 12.5  | 1.1                |
| L-Thekla          | Urban        | 02.04.2004 00:00 | 29.04.2020 18:00 | 16.1  | 1.6                |
| L-West            | Urban        | 01.01.2000 00:00 | 31.12.2020 23:00 | 21    | 1.8                |
| Plauen-DWD        | Urban        | 20.11.2003 13:00 | 14.07.2020 08:00 | 16.7  | 2.5                |
| Zittau-Ost        | Urban        | 10.01.1997 12:00 | 31.12.2020 23:00 | 24    | 2.3                |
| Collmberg         | Rural        | 30.09.1998 11:00 | 31.12.2020 23:00 | 22.3  | 2.1                |
| Niesky            | Rural        | 05.05.2003 15:00 | 31.12.2020 23:00 | 17.7  | 1.4                |
| Radebeul-Wahnsd.  | Rural        | 01.01.1974 00:00 | 31.12.2020 23:00 | 47    | 3.3                |
| Schkeuditz        | Rural        | 06.06.2003 13:00 | 31.12.2020 23:00 | 17.6  | 1                  |
| Carlsfeld         | Mountain     | 01.01.1997 00:00 | 31.12.2020 23:00 | 24    | 2.3                |
| Fichtelberg       | Mountain     | 01.01.1997 00:00 | 31.12.2020 23:00 | 24    | 4.7                |
| Schwartenberg     | Mountain     | 11.02.1998 14:00 | 31.12.2020 23:00 | 22.9  | 2.1                |
| Zinnwald          | Mountain     | 02.01.1997 09:00 | 31.12.2020 23:00 | 24    | 2                  |

**Table S2: Availability of further measurement parameters (O<sub>3</sub>, NO, NO<sub>2</sub>, NO<sub>x</sub>, temperature (T), global radiation (GR), relative humidity (RH), wind direction (WD), wind speed (WS), and air pressure) per station.**

| Station           | Station type | O <sub>3</sub> | NO | NO <sub>2</sub> | NO <sub>x</sub> | T | GR | RH | WD | WS | Air pressure |
|-------------------|--------------|----------------|----|-----------------|-----------------|---|----|----|----|----|--------------|
| DD-Nord           | Traffic      | x              | x  | x               | x               | x | x  | x  | x  | x  | x            |
| Annaberg          | Urban        | x              | x  | x               | x               | x | x  | x  | x  | x  | x            |
| Bautzen           | Urban        | x              | x  | x               | x               | x | x  | x  | x  | x  | x            |
| DD-Winkelmannstr. | Urban        | x              | x  | x               | x               | x | x  | x  | x  | x  | x            |
| L-Thekla          | Urban        | x              |    |                 |                 | x | x  | x  | x  | x  | x            |
| L-West            | Urban        | x              | x  | x               | x               | x | x  | x  | x  | x  | x            |
| Plauen-DWD        | Urban        | x              |    |                 |                 | x | x  | x  | x  | x  | x            |
| Zittau-Ost        | Urban        | x              | x  | x               | x               | x | x  | x  | x  | x  | x            |
| Collmberg         | Rural        | x              | x  | x               | x               | x | x  | x  | x  | x  | x            |
| Niesky            | Rural        | x              | x  | x               | x               | x | x  | x  | x  | x  | x            |
| Radebeul-Wahnsd.  | Rural        | x              | x  | x               | x               | x | x  | x  | x  | x  | x            |
| Schkeuditz        | Rural        | x              | x  | x               | x               | x | x  | x  | x  | x  | x            |
| Carlsfeld         | Mountain     | x              |    |                 |                 | x | x  | x  | x  | x  | x            |
| Fichtelberg       | Mountain     | x              |    |                 |                 | x | x  | x  | x  | x  | x            |
| Schwartenberg     | Mountain     | x              | x  | x               | x               | x | x  | x  | x  | x  | x            |
| Zinnwald          | Mountain     | x              | x  | x               | x               | x | x  | x  | x  | x  | x            |

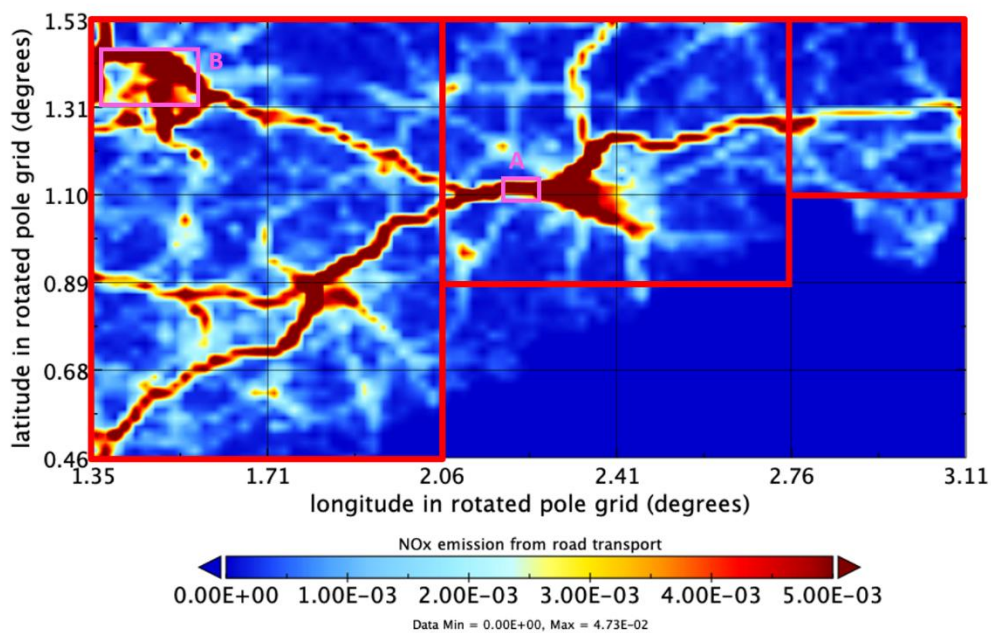

**Figure S1:** The whole saxony as the emission area for modelling. The entire region was divided into three red rectangular areas and the emission data (here coloured by NO<sub>x</sub> emission value (in kg m<sup>-2</sup>) from road transport in 2019) were averaged according to the ratio of area. The areas marked with A and B in pink, respectively, are suggestive of traffic and Leipzig urban area for averaging the emission data.

**Table S3.** Modelling configuration and settings for summer and winter scenarios.

| <b>Model setting</b>               | <b>Unit</b>        | <b>Summer</b>               | <b>Winter</b>                 | <b>Reference</b>       |
|------------------------------------|--------------------|-----------------------------|-------------------------------|------------------------|
| <b>Initial time</b>                |                    | 00:00 CET, 14<br>July, 2019 | 00:00CET, 14<br>January, 2019 |                        |
| <b>Meteorological conditions</b>   |                    |                             |                               |                        |
| Temperature                        | °C                 | 15                          | 4                             | Measured               |
| Pressure                           | hPa                | 1000                        | 1000                          | Measured               |
| Relative humidity                  | %                  | 70                          | 70                            | Measured               |
| Ratio of Solar radiation*          |                    | 0.7                         | 0.4                           | Measured               |
| <b>Deposition rate</b>             |                    |                             |                               |                        |
| NO <sub>2</sub>                    | cm s <sup>-1</sup> | 0.3                         | 3                             | Rondón et al. (1993)   |
| N <sub>2</sub> O <sub>5</sub>      | cm s <sup>-1</sup> | 100                         | 2                             | Hoffmann et al. (2019) |
| O <sub>3</sub>                     | cm s <sup>-1</sup> | 0.8                         | 0.08                          | Clifton et al. (2020)  |
| NO                                 | cm s <sup>-1</sup> | 0.05                        | 0.05                          | Zhu et al. (2020)      |
| HNO <sub>3</sub>                   | cm s <sup>-1</sup> | 3.5                         | 3.5                           | Zhu et al. (2020)      |
| H <sub>2</sub> O <sub>2</sub>      | cm s <sup>-1</sup> | 1                           | 1                             | Zhu et al. (2020)      |
| CO                                 | cm s <sup>-1</sup> | 0.1                         | 0.1                           | Zhu et al. (2020)      |
| HCl                                | cm s <sup>-1</sup> | 1                           | 1                             | Zhu et al. (2020)      |
| NH <sub>3</sub>                    | cm s <sup>-1</sup> | 1                           | 1                             | Zhu et al. (2020)      |
| SO <sub>2</sub>                    | cm s <sup>-1</sup> | 1                           | 1                             | Zhu et al. (2020)      |
| HSO <sub>4</sub>                   | cm s <sup>-1</sup> | 2                           | 2                             | Zhu et al. (2020)      |
| HCHO                               | cm s <sup>-1</sup> | 1                           | 1                             | Zhu et al. (2020)      |
| CH <sub>3</sub> OH                 | cm s <sup>-1</sup> | 1                           | 1                             | Zhu et al. (2020)      |
| CH <sub>3</sub> CH <sub>2</sub> OH | cm s <sup>-1</sup> | 0.5                         | 0.5                           | Zhu et al. (2020)      |
| PANs                               | cm s <sup>-1</sup> | 0.7                         | 0.7                           | Wu et al. (2012)       |
| CHClO                              | cm s <sup>-1</sup> | 0.2                         | 0.2                           | Hoffmann et al. (2019) |
| CHBrO                              | cm s <sup>-1</sup> | 0.2                         | 0.2                           | Hoffmann et al. (2019) |
| <b>Boundary layer height (BLH)</b> |                    |                             |                               |                        |
| Daytime BLHs                       | m                  | 500                         | 2000                          |                        |
| Nighttime BLHs                     | m                  | 250                         | 1000                          |                        |
| <b>Measured Chemical data</b>      |                    |                             |                               |                        |
| O <sub>3</sub>                     | µg m <sup>-3</sup> | 63                          | 43                            | Measured               |

|                 |                    |        |        |                             |
|-----------------|--------------------|--------|--------|-----------------------------|
| NO <sub>2</sub> | µg m <sup>-3</sup> | 6.5    | 13.3   | Measured                    |
| SO <sub>2</sub> | µg m <sup>-3</sup> | 54     | 3      | UBA website                 |
| CO              | µg m <sup>-3</sup> | 178.1  | 178.1  | Zellweger et al. (2009)     |
| CH <sub>4</sub> | µg m <sup>-3</sup> | 1155.8 | 1155.8 | Schaefer (2019)             |
| HONO            | ppb                | 0.5    | 0.5    | Stieger et al. (2018)       |
| PAN             | ppb                | 0.5    | 0.5    | Pandey Deolal et al. (2014) |

\* Ratio of solar radiation was derived from the measured solar radiation, it is equal to the mean value divided by the maximum.

**Table S4. Dominant initial gas-phase concentrations applied in the final 24-hour simulations for summer and winter scenarios. The identity of each species is given as a compound string based on the CAPRAM and MCM models (<https://capram.tropos.de/index.html> and <https://mcm.york.ac.uk/>).**

| Summer          |                              | Winter          |                              |
|-----------------|------------------------------|-----------------|------------------------------|
| Compound string | Unit                         | Compound string | Unit                         |
| <b>Summer</b>   | <b>molec cm<sup>-3</sup></b> | <b>Winter</b>   | <b>molec cm<sup>-3</sup></b> |
| C               | 4.34E+13                     | C               | 4.34E+13                     |
| H2              | 1.28E+13                     | H2              | 1.28E+13                     |
| CO              | 3.83E+12                     | CO              | 3.83E+12                     |
| O3              | 7.91E+11                     | O3              | 5.35E+11                     |
| CO2             | 9.10E+15                     | CO2             | 9.10E+15                     |
| [H2O]           | 5.10E+17                     | [H2O]           | 5.10E+17                     |
| [O2]            | 5.10E+18                     | [O2]            | 5.10E+18                     |
| [N2]            | 1.96E+19                     | [N2]            | 1.96E+19                     |
| SO2             | 2.82E+10                     | SO2             | 4.70E+10                     |
| H2O2            | 8.53E+09                     | H2O2            | 6.45E+09                     |
| NO2             | 8.56E+10                     | NO2             | 1.74E+11                     |
| HONO            | 1.23E+10                     | HONO            | 1.23E+10                     |
| OC              | 3.44E+07                     | OC              | 9.31E+06                     |
| C=O             | 9.46E+10                     | C=O             | 1.28E+11                     |
| CCO             | 4.87E+10                     | CCO             | 1.94E+10                     |
| CC=O            | 4.90E+10                     | CC=O            | 2.94E+11                     |
| CCCO            | 9.43E+06                     | CCCO            | 7.20E+07                     |
| CCC=O           | 3.25E+09                     | CCC=O           | 4.71E+10                     |
| CC(O)C          | 1.34E+09                     | CC(O)C          | 1.86E+10                     |
| CC(=O)C         | 9.85E+09                     | CC(=O)C         | 4.11E+10                     |
| CCCCO           | 2.40E+07                     | CCCCO           | 3.32E+08                     |
| CCCC=O          | 1.13E+09                     | CCCC=O          | 1.14E+10                     |
| CCC(O)C         | 1.27E+07                     | CCC(O)C         | 1.02E+08                     |
| CCC(=O)C        | 1.42E+11                     | CCC(=O)C        | 7.44E+10                     |
| CC(C)CO         | 2.04E+05                     | CC(C)CO         | 2.42E+04                     |

|                 |          |                 |          |
|-----------------|----------|-----------------|----------|
| CC(C)C=O        | 6.99E+07 | CC(C)C=O        | 5.34E+08 |
| CC(O)(C)C       | 2.48E+04 | CC(O)(C)C       | 8.71E+02 |
| CCC(O)CC        | 2.16E+04 | CCC(O)CC        | 5.79E+04 |
| CCC(=O)CC       | 3.56E+08 | CCC(=O)CC       | 5.71E+08 |
| CCC(C)CO        | 4.98E+04 | CCC(C)CO        | 1.36E+05 |
| CCC(C)C=O       | 4.79E+06 | CCC(C)C=O       | 5.20E+07 |
| CCC(O)(C)C      | 6.99E+03 | CCC(O)(C)C      | 8.75E+03 |
| CC(O)C(C)C      | 3.27E+04 | CC(O)C(C)C      | 8.87E+04 |
| CC(=O)C(C)C     | 5.30E+08 | CC(=O)C(C)C     | 9.20E+08 |
| C1CCC(O)CC1     | 2.95E+06 | C1CCC(O)CC1     | 7.18E+07 |
| C1CCC(=O)CC1    | 5.09E+08 | C1CCC(=O)CC1    | 2.52E+09 |
| CC(=O)CC(O)(C)C | 6.00E+02 | CC(=O)CC(O)(C)C | 2.83E+02 |
| OCCO            | 1.05E+07 | OCCO            | 1.25E+07 |
| OCC=O           | 9.45E+09 | OCC=O           | 1.96E+10 |
| CC(O)CO         | 2.28E+08 | CC(O)CO         | 4.98E+09 |
| CC(=O)CO        | 6.19E+09 | CC(=O)CO        | 4.91E+09 |
| CC(O)C=O        | 7.78E+07 | CC(O)C=O        | 8.09E+08 |
| CC(O)(C)C=O     | 4.50E+06 | CC(O)(C)C=O     | 1.15E+06 |
| C=C             | 2.00E+09 | C=C             | 4.33E+10 |
| CCCCC=O         | 2.25E+08 | CCCCC=O         | 6.78E+09 |
| O=CC=C          | 1.41E+09 | O=CC=C          | 1.23E+10 |
| O=CC=O          | 6.84E+09 | O=CC=O          | 2.64E+10 |
| CC(C=O)=C       | 9.58E+08 | CC(C=O)=C       | 7.20E+08 |
| CC(=O)C=O       | 3.03E+09 | CC(=O)C=O       | 6.20E+09 |
| CC=CC=O         | 9.91E+07 | CC=CC=O         | 5.40E+08 |
| C               | 4.62E+13 | C               | 5.09E+13 |
| CC              | 1.65E+10 | CC              | 8.75E+10 |
| CCC             | 1.91E+10 | CCC             | 8.32E+09 |
| CCCC            | 1.78E+11 | CCCC            | 1.02E+11 |
| CC(C)C          | 5.06E+09 | CC(C)C          | 2.76E+09 |
| CCCCC           | 1.03E+09 | CCCCC           | 1.17E+10 |
| CCC(C)C         | 1.89E+09 | CCC(C)C         | 2.06E+10 |
| CCCCCC          | 7.61E+08 | CCCCCC          | 1.10E+10 |
| CCCC(C)C        | 1.13E+09 | CCCC(C)C        | 1.51E+10 |
| CCC(C)CC        | 2.21E+08 | CCC(C)CC        | 3.19E+09 |
| CC(C)C(C)C      | 1.28E+08 | CC(C)C(C)C      | 1.93E+09 |
| CCCCCCC         | 3.60E+09 | CCCCCCC         | 5.85E+10 |
| CCCC(C)CC       | 6.53E+08 | CCCC(C)CC       | 1.08E+10 |
| CCCCCCCC        | 6.38E+08 | CCCCCCCC        | 1.18E+10 |
| CCCCCCCCC       | 2.33E+08 | CCCCCCCCC       | 4.68E+09 |

|                       |          |                       |          |
|-----------------------|----------|-----------------------|----------|
| CCCCCCCCC             | 1.54E+08 | CCCCCCCCC             | 3.26E+09 |
| CCCCCCCCCCC           | 3.64E+08 | CCCCCCCCCCC           | 8.19E+09 |
| C1CCCCC1              | 5.58E+08 | C1CCCCC1              | 9.16E+09 |
| CC=C                  | 8.70E+08 | CC=C                  | 2.12E+10 |
| CCC=C                 | 1.62E+08 | CCC=C                 | 4.03E+09 |
| cCC=CC                | 6.24E+07 | cCC=CC                | 1.75E+09 |
| CC=CC                 | 5.19E+07 | CC=CC                 | 1.38E+09 |
| CC(C)=C               | 1.11E+06 | CC(C)=C               | 5.73E+07 |
| CCCC=C                | 1.04E+08 | CCCC=C                | 2.32E+09 |
| CCC(C)=C              | 3.35E+05 | CCC(C)=C              | 1.46E+07 |
| CC(C)C=C              | 1.75E+07 | CC(C)C=C              | 3.90E+08 |
| CC=C(C)C              | 2.52E+07 | CC=C(C)C              | 8.88E+08 |
| CCCC=C                | 2.06E+08 | CCCC=C                | 5.01E+09 |
| C                     | 4.62E+13 | C                     | 5.09E+13 |
| O=CO                  | 3.28E+09 | O=CO                  | 1.73E+09 |
| c1cccc1               | 2.04E+09 | c1cccc1               | 1.12E+10 |
| O=CC1OC1C=CC=O        | 9.75E+05 | O=CC1OC1C=CC=O        | 3.73E+06 |
| c1ccc(O)cc1           | 1.29E+07 | c1ccc(O)cc1           | 6.18E+07 |
| c1cccc1C              | 4.34E+09 | c1cccc1C              | 6.65E+10 |
| c1cccc(O)c1C          | 1.81E+08 | c1cccc(O)c1C          | 5.84E+09 |
| CC(=O)C=CC1OC1C=O     | 7.49E+06 | CC(=O)C=CC1OC1C=O     | 9.24E+07 |
| Cc1cccc1C             | 1.60E+08 | Cc1cccc1C             | 2.56E+09 |
| CC1(C=O)OC1(C)C=CC=O  | 2.37E+06 | CC1(C=O)OC1(C)C=CC=O  | 3.30E+07 |
| Cc1cccc(O)c1C         | 9.67E+05 | Cc1cccc(O)c1C         | 8.07E+06 |
| c1c(C)cccc1C          | 3.84E+07 | c1c(C)cccc1C          | 6.77E+08 |
| CC(=O)C=CC1OC1(C)C=O  | 1.22E+06 | CC(=O)C=CC1OC1(C)C=O  | 2.33E+07 |
| c1c(C)c(O)ccc1C       | 3.09E+05 | c1c(C)c(O)ccc1C       | 3.06E+06 |
| c1cc(C)ccc1C          | 2.06E+08 | c1cc(C)ccc1C          | 3.35E+09 |
| CC(=O)C=CC1(C)OC1C=O  | 1.20E+06 | CC(=O)C=CC1(C)OC1C=O  | 1.69E+07 |
| c1cc(C)c(O)cc1C       | 9.40E+05 | c1cc(C)c(O)cc1C       | 7.90E+06 |
| c1cccc1CC             | 3.97E+07 | c1cccc1CC             | 6.98E+08 |
| c1cccc(O)c1CC         | 2.69E+05 | c1cccc(O)c1CC         | 2.83E+06 |
| CCC(=O)C=CC1OC1C=O    | 1.59E+05 | CCC(=O)C=CC1OC1C=O    | 2.34E+06 |
| c1cccc1CCC            | 1.38E+07 | c1cccc1CCC            | 2.14E+08 |
| c1cccc(O)c1CCC        | 7.75E+04 | c1cccc(O)c1CCC        | 7.17E+05 |
| CCCC(=O)C=CC1OC1C=O   | 4.54E+04 | CCCC(=O)C=CC1OC1C=O   | 5.83E+05 |
| c1cccc1C(C)C          | 3.50E+06 | c1cccc1C(C)C          | 5.75E+07 |
| c1cccc(O)c1C(C)C      | 2.14E+04 | c1cccc(O)c1C(C)C      | 2.10E+05 |
| CC(C)C(=O)C=CC1OC1C=O | 1.25E+04 | CC(C)C(=O)C=CC1OC1C=O | 1.72E+05 |
| Cc1cccc(C)c1C         | 1.99E+07 | Cc1cccc(C)c1C         | 3.44E+08 |

|                         |          |                         |          |
|-------------------------|----------|-------------------------|----------|
| Cc1ccc(O)c(C)c1C        | 4.53E+04 | Cc1ccc(O)c(C)c1C        | 4.88E+05 |
| CC(=O)C=CC1OC1(C)C(=O)C | 1.16E+06 | CC(=O)C=CC1OC1(C)C(=O)C | 2.94E+07 |
| Cc1ccc(C)cc1C           | 7.07E+07 | Cc1ccc(C)cc1C           | 1.22E+09 |
| Cc1c(O)c(C)ccc1C        | 1.60E+05 | Cc1c(O)c(C)ccc1C        | 1.72E+06 |
| CC(=O)C=CC1(C)OC1(C)C=O | 2.79E+06 | CC(=O)C=CC1(C)OC1(C)C=O | 5.79E+07 |
| c1c(C)cc(C)cc1C         | 4.95E+07 | c1c(C)cc(C)cc1C         | 6.87E+08 |
| c1c(C)c(O)c(C)cc1C      | 3.19E+05 | c1c(C)c(O)c(C)cc1C      | 5.17E+06 |
| CC(=O)C=C(C)C1OC1(C)C=O | 6.17E+05 | CC(=O)C=C(C)C1OC1(C)C=O | 1.06E+07 |
| Cc1ccccc1CC             | 2.72E+07 | Cc1ccccc1CC             | 4.14E+08 |
| CCC1(C=O)OC1(C)C=CC=O   | 3.54E+05 | CCC1(C=O)OC1(C)C=CC=O   | 4.61E+06 |
| Cc1ccccc(O)c1CC         | 1.44E+05 | Cc1ccccc(O)c1CC         | 1.14E+06 |
| c1c(C)cccc1CC           | 1.20E+07 | c1c(C)cccc1CC           | 2.08E+08 |
| CCC(=O)C=CC1OC1(C)C=O   | 3.08E+05 | CCC(=O)C=CC1OC1(C)C=O   | 5.42E+06 |
| c1ccc(C)c(O)c1CC        | 8.47E+04 | c1ccc(C)c(O)c1CC        | 7.69E+05 |
| c1ccccc1C=C             | 5.83E+06 | c1ccccc1C=C             | 3.57E+08 |
| c1ccccc1C=O             | 1.47E+09 | c1ccccc1C=O             | 9.50E+09 |
| CLC(CL)=C(CL)CL         | 1.99E+09 | CLC(CL)=C(CL)CL         | 5.10E+08 |
| CLC(CL)=CCL             | 3.19E+08 | CLC(CL)=CCL             | 1.72E+08 |
| CLCCCL                  | 1.96E+08 | CLCCCL                  | 5.18E+07 |
| CLC=C                   | 5.84E+07 | CLC=C                   | 1.16E+09 |
| O=CCL                   | 1.01E+08 | O=CCL                   | 4.16E+08 |
| C=CC=C                  | 4.75E+07 | C=CC=C                  | 2.04E+09 |
| C=CC(C)=C               | 8.42E+08 | C=CC(C)=C               | 5.52E+07 |
| CC(=O)C=C               | 1.80E+09 | CC(=O)C=C               | 9.14E+07 |
| CC(=C)CC=O              | 1.33E+07 | CC(=C)CC=O              | 9.36E+05 |
| CC(=O)CC=C              | 9.11E+07 | CC(=O)CC=C              | 4.90E+06 |
| COC=O                   | 2.21E+10 | COC=O                   | 5.16E+09 |
| CC(=O)OC                | 2.26E+09 | CC(=O)OC                | 6.33E+08 |
| CCOC(=O)C               | 2.78E+09 | CCOC(=O)C               | 1.35E+09 |
| CCCOC(=O)C              | 1.76E+08 | CCCOC(=O)C              | 1.85E+09 |
| CC(=O)OC(C)C            | 7.26E+09 | CC(=O)OC(C)C            | 5.86E+09 |
| CCCCOC(=O)C             | 4.54E+08 | CCCCOC(=O)C             | 6.24E+09 |
| COC                     | 9.59E+09 | COC                     | 6.22E+09 |
| CCOCC                   | 2.45E+07 | CCOCC                   | 5.73E+08 |
| COCCO                   | 3.85E+08 | COCCO                   | 8.60E+09 |
| COCC=O                  | 4.98E+07 | COCC=O                  | 1.04E+09 |
| CCOCCO                  | 1.61E+03 | CCOCCO                  | 1.70E+04 |
| CCOCC=O                 | 3.76E+04 | CCOCC=O                 | 3.01E+05 |
| CCCC(=O)C               | 1.37E+08 | CCCC(=O)C               | 3.85E+08 |
| CCCCC(=O)C              | 1.01E+08 | CCCCC(=O)C              | 4.55E+08 |

|                       |          |                       |          |
|-----------------------|----------|-----------------------|----------|
| CCCC(=O)CC            | 1.15E+08 | CCCC(=O)CC            | 4.25E+08 |
| CC(=O)CC(C)C          | 2.70E+07 | CC(=O)CC(C)C          | 1.38E+08 |
| C12CC(C1(C)C)CC=C2C   | 3.12E+08 | C12CC(C1(C)C)CC=C2C   | 2.49E+08 |
| CC1(C)C(CC12)CCC2=C   | 3.10E+08 | CC1(C)C(CC12)CCC2=C   | 4.28E+08 |
| CC1(C)C(C2)C(=O)CCC12 | 5.15E+09 | CC1(C)C(C2)C(=O)CCC12 | 2.43E+09 |
| C1CC(C)=CCC1C(C)=C    | 7.84E+07 | C1CC(C)=CCC1C(C)=C    | 1.83E+09 |
| CC(=O)O               | 3.59E+10 | CC(=O)O               | 9.59E+10 |
| CCC(=O)O              | 1.09E+09 | CCC(=O)O              | 4.81E+09 |
| C1OC1                 | 8.56E+08 | C1OC1                 | 2.14E+08 |
| OCCOO                 | 1.54E+08 | OCCOO                 | 2.16E+08 |
| OCCON(=O)=O           | 2.59E+08 | OCCON(=O)=O           | 1.15E+08 |
| OCCCOO                | 5.36E+07 | OCCCOO                | 1.08E+07 |
| OCCCON(=O)=O          | 1.29E+08 | OCCCON(=O)=O          | 4.31E+07 |
| OCCC=O                | 1.16E+09 | OCCC=O                | 1.46E+09 |
| OCCCO                 | 1.34E+06 | OCCCO                 | 1.64E+05 |
| CC(OO)CO              | 1.54E+07 | CC(OO)CO              | 3.10E+08 |
| CC(ON(=O)=O)CO        | 2.97E+08 | CC(ON(=O)=O)CO        | 1.03E+09 |
| CC(O)COO              | 5.02E+06 | CC(O)COO              | 5.83E+07 |
| CC(O)CON(=O)=O        | 1.89E+07 | CC(O)CON(=O)=O        | 6.49E+07 |
| CCC(OO)CO             | 2.99E+06 | CCC(OO)CO             | 7.39E+07 |
| CCC(ON(=O)=O)CO       | 9.07E+07 | CCC(ON(=O)=O)CO       | 4.19E+08 |
| CCC(=O)CO             | 5.00E+07 | CCC(=O)CO             | 9.92E+07 |
| CCC(O)CO              | 6.19E+05 | CCC(O)CO              | 2.66E+06 |
| CC(OO)CCO             | 3.92E+05 | CC(OO)CCO             | 7.14E+05 |
| CC(ON(=O)=O)CCO       | 5.04E+06 | CC(ON(=O)=O)CCO       | 8.84E+06 |
| CC(O)CCO              | 1.45E+05 | CC(O)CCO              | 3.22E+04 |
| CC(=O)CCO             | 1.34E+08 | CC(=O)CCO             | 4.09E+08 |
| CC(O)C(OO)C           | 7.58E+06 | CC(O)C(OO)C           | 1.54E+08 |
| CC(O)C(ON(=O)=O)C     | 1.63E+08 | CC(O)C(ON(=O)=O)C     | 1.47E+09 |
| CC(O)C(=O)C           | 8.22E+07 | CC(O)C(=O)C           | 3.57E+08 |
| CC(O)C(O)C            | 3.04E+05 | CC(O)C(O)C            | 4.13E+06 |
| CC(OO)(C)CO           | 1.69E+05 | CC(OO)(C)CO           | 3.34E+06 |
| CC(ON(=O)=O)(C)CO     | 7.33E+05 | CC(ON(=O)=O)(C)CO     | 3.30E+06 |
| CC(O)(C)CO            | 2.81E+04 | CC(O)(C)CO            | 1.30E+04 |
| CC(CO)COO             | 6.61E+04 | CC(CO)COO             | 1.38E+04 |
| CC(CO)CON(=O)=O       | 3.15E+05 | CC(CO)CON(=O)=O       | 2.01E+05 |
| CC(CO)C=O             | 1.84E+06 | CC(CO)C=O             | 6.98E+06 |
| CC(CO)CO              | 1.84E+03 | CC(CO)CO              | 2.19E+02 |
| CC(O)(C)COO           | 1.62E+06 | CC(O)(C)COO           | 5.08E+05 |
| CC(O)(C)CON(=O)=O     | 5.63E+06 | CC(O)(C)CON(=O)=O     | 1.26E+06 |



|                       |          |                       |          |
|-----------------------|----------|-----------------------|----------|
| CCC(O)CCOO            | 1.00E+06 | CCC(O)CCOO            | 2.57E+05 |
| CCC(O)CCON(=O)=O      | 2.78E+06 | CCC(O)CCON(=O)=O      | 3.04E+06 |
| CCC(O)CCO             | 3.64E+04 | CCC(O)CCO             | 4.96E+03 |
| CCC(O)CC=O            | 7.42E+06 | CCC(O)CC=O            | 5.79E+06 |
| CCC(O)C(OO)C          | 3.71E+06 | CCC(O)C(OO)C          | 6.21E+07 |
| CCC(O)C(ON(=O)=O)C    | 6.68E+07 | CCC(O)C(ON(=O)=O)C    | 8.92E+08 |
| CCC(O)C(O)C           | 2.44E+05 | CCC(O)C(O)C           | 2.81E+06 |
| CCC(O)C(=O)C          | 2.87E+07 | CCC(O)C(=O)C          | 2.14E+08 |
| CC(OO)C(C)CO          | 6.23E+04 | CC(OO)C(C)CO          | 6.10E+04 |
| CC(ON(=O)=O)C(C)CO    | 1.07E+06 | CC(ON(=O)=O)C(C)CO    | 2.08E+06 |
| CC(O)C(C)CO           | 6.15E+03 | CC(O)C(C)CO           | 2.84E+03 |
| CC(=O)C(C)CO          | 4.30E+06 | CC(=O)C(C)CO          | 1.27E+07 |
| CCC(OO)(C)CO          | 5.55E+04 | CCC(OO)(C)CO          | 1.03E+06 |
| CCC(ON(=O)=O)(C)CO    | 2.75E+05 | CCC(ON(=O)=O)(C)CO    | 1.56E+06 |
| CCC(O)(C)CO           | 2.57E+05 | CCC(O)(C)CO           | 1.04E+04 |
| CC(O)(C)CCO           | 2.39E+05 | CC(O)(C)CCO           | 3.97E+04 |
| CC(C)C(OO)CO          | 3.45E+05 | CC(C)C(OO)CO          | 8.32E+06 |
| CC(C)C(ON(=O)=O)CO    | 1.27E+07 | CC(C)C(ON(=O)=O)CO    | 6.94E+07 |
| CC(C)C(O)CO           | 2.14E+04 | CC(C)C(O)CO           | 2.65E+05 |
| CC(C)C(=O)CO          | 4.85E+06 | CC(C)C(=O)CO          | 1.36E+07 |
| CC(O)(C)CCOO          | 3.39E+06 | CC(O)(C)CCOO          | 1.75E+06 |
| CC(O)(C)CCON(=O)=O    | 3.96E+07 | CC(O)(C)CCON(=O)=O    | 2.00E+07 |
| CC(O)(C)CC=O          | 1.80E+07 | CC(O)(C)CC=O          | 6.01E+07 |
| CC(OO)C(O)(C)C        | 1.78E+06 | CC(OO)C(O)(C)C        | 3.28E+07 |
| CC(ON(=O)=O)C(O)(C)C  | 6.93E+07 | CC(ON(=O)=O)C(O)(C)C  | 4.62E+08 |
| CC(O)C(O)(C)C         | 6.44E+04 | CC(O)C(O)(C)C         | 1.13E+06 |
| CC(=O)C(O)(C)C        | 4.71E+08 | CC(=O)C(O)(C)C        | 5.53E+09 |
| CCC(O)(C)COO          | 2.30E+06 | CCC(O)(C)COO          | 1.87E+05 |
| CCC(O)(C)CON(=O)=O    | 7.91E+06 | CCC(O)(C)CON(=O)=O    | 6.48E+05 |
| CCC(O)(C)C=O          | 5.65E+06 | CCC(O)(C)C=O          | 5.98E+05 |
| CC(O)C(C)COO          | 1.11E+05 | CC(O)C(C)COO          | 7.70E+04 |
| CC(O)C(C)CON(=O)=O    | 2.43E+05 | CC(O)C(C)CON(=O)=O    | 6.44E+05 |
| CC(O)C(C)C=O          | 7.81E+05 | CC(O)C(C)C=O          | 5.13E+06 |
| CC(O)C(OO)(C)C        | 5.48E+06 | CC(O)C(OO)(C)C        | 8.95E+07 |
| CC(O)C(ON(=O)=O)(C)C  | 7.07E+07 | CC(O)C(ON(=O)=O)(C)C  | 2.48E+08 |
| C1CC(O)C(OO)CC1       | 3.05E+04 | C1CC(O)C(OO)CC1       | 5.16E+05 |
| C1CC(O)C(ON(=O)=O)CC1 | 3.26E+05 | C1CC(O)C(ON(=O)=O)CC1 | 2.84E+06 |
| C1CC(O)C(O)CC1        | 9.40E+02 | C1CC(O)C(O)CC1        | 1.07E+04 |
| C1CC(O)C(=O)CC1       | 1.67E+05 | C1CC(O)C(=O)CC1       | 8.82E+05 |
| CC(=O)C(OO)C(O)(C)C   | 2.31E+00 | CC(=O)C(OO)C(O)(C)C   | 7.43E+03 |

|                         |          |                   |          |
|-------------------------|----------|-------------------|----------|
| CC(=O)CC(O)(C)COO       | 1.08E+00 | CC(=O)CC(O)(C)C=O | 8.51E+02 |
| CC(=O)CC(O)(C)CON(=O)=O | 4.82E+00 | CC(O)(C)CC(=O)COO | 7.98E+05 |
| CC(=O)CC(O)(C)CO        | 9.24E+03 | CC(O)(C)CC(=O)CO  | 3.28E+04 |

**Table S5. Changing the emission multiplier for NO<sub>x</sub> and TNMVOC in the simulations. Total simulations numbers are 1600 (40 x 40).**

| <b>Number</b> | <b>Emission Factor</b> |
|---------------|------------------------|
| 1             | 0.001                  |
| 2             | 0.005                  |
| 3             | 0.01                   |
| 4             | 0.05                   |
| 5             | 0.1                    |
| 6             | 0.5                    |
| 7             | 1                      |
| 8             | 1.5                    |
| 9             | 2                      |
| 10            | 2.5                    |
| 11            | 3                      |
| 12            | 3.5                    |
| 13            | 4                      |
| 14            | 4.5                    |
| 15            | 5                      |
| 16            | 5.5                    |
| 17            | 6                      |
| 18            | 6.5                    |
| 19            | 7                      |
| 20            | 7.5                    |
| 21            | 8                      |
| 22            | 8.5                    |
| 23            | 9                      |
| 24            | 9.5                    |
| 25            | 10                     |
| 26            | 10.5                   |
| 27            | 11                     |
| 28            | 11.5                   |
| 29            | 12                     |
| 30            | 15                     |
| 31            | 20                     |
| 32            | 25                     |

|    |    |
|----|----|
| 33 | 30 |
| 34 | 35 |
| 35 | 40 |
| 36 | 45 |
| 37 | 50 |
| 38 | 60 |
| 39 | 70 |
| 40 | 80 |

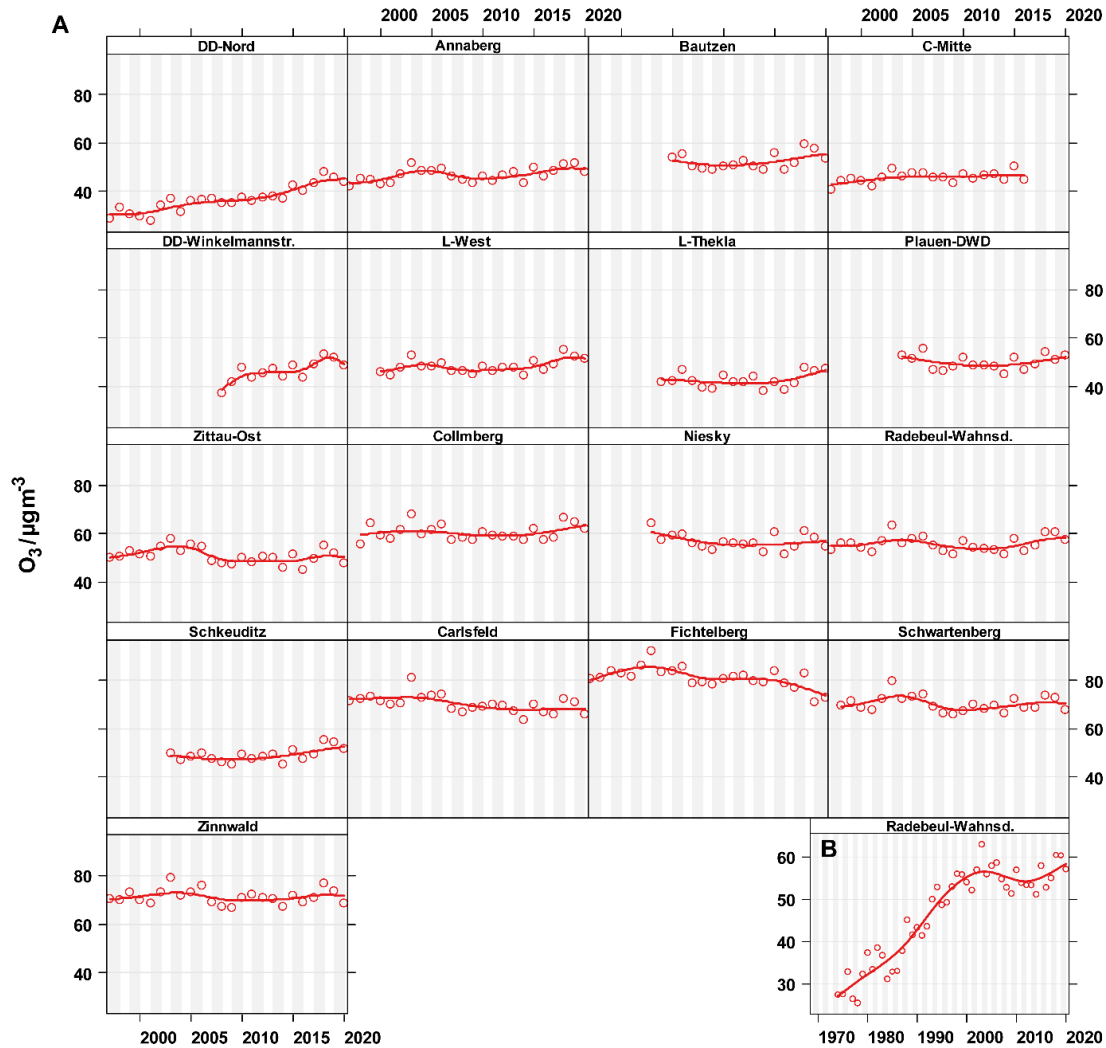

Figure S2: Smooth trends in annual means of O<sub>3</sub> for A) all stations from 1997 (or later) to 2020 and B) Radebeul-Wahnsdorf from 1974 - 2020.

**Table S6. Trends of the mean ozone concentration at the stations of the Saxony air quality monitoring network for three different time periods. Statistically non-significant values with  $p > 0.05$  are put in brackets. \* means the years begin from 2008.**

| Station           | Station type | All available years                    |                      | 15 years                               |                      | 10 years                               |                      |
|-------------------|--------------|----------------------------------------|----------------------|----------------------------------------|----------------------|----------------------------------------|----------------------|
|                   |              | 1997 (or later) until 2020             |                      | 2006 to 2020                           |                      | 2011 to 2020                           |                      |
|                   |              | abs. Trend                             | rel. Trend           | abs. Trend                             | rel. Trend           | abs. Trend                             | rel. Trend           |
|                   |              | $\mu\text{g m}^{-3} \text{ year}^{-1}$ | % year <sup>-1</sup> | $\mu\text{g m}^{-3} \text{ year}^{-1}$ | % year <sup>-1</sup> | $\mu\text{g m}^{-3} \text{ year}^{-1}$ | % year <sup>-1</sup> |
| DD-Nord           | Traffic      | 0.65                                   | 2.30                 | 0.75                                   | 2.27                 | 1.19                                   | 3.50                 |
| Annaberg          | Urban        | 0.17                                   | 0.38                 | 0.28                                   | 0.63                 | 0.51                                   | 1.14                 |
| Bautzen           | Urban        | 0.24                                   | 0.47                 | 0.35                                   | 0.72                 | 0.59                                   | 1.19                 |
| DD-Winkelmannstr. | Urban        | 0.65                                   | 1.57                 | 0.65*                                  | 1.57*                | 0.74                                   | 1.75                 |
| L-West            | Urban        | 0.19                                   | 0.42                 | 0.38                                   | 0.83                 | 0.64                                   | 1.42                 |
| L-Thekla          | Urban        | (0.15)                                 | (0.37)               | (0.13)                                 | (0.32)               | 0.51                                   | 1.28                 |
| Plauen-DWD        | Urban        | (-0.09)                                | (-0.17)              | (0.09)                                 | (0.20)               | (0.41)                                 | (0.85)               |
| Zittau-Ost        | Urban        | -0.14                                  | -0.27                | (0.03)                                 | (0.06)               | (0.24)                                 | (0.51)               |
| Collnberg         | Rural        | (-0.03)                                | (-0.05)              | 0.26                                   | 0.45                 | 0.53                                   | 0.92                 |
| Niesky            | Rural        | (-0.13)                                | (-0.23)              | (0.05)                                 | (0.10)               | (0.15)                                 | (0.28)               |
| Radebeul-Wahnsd.  | Rural        | (0.05)                                 | (0.09)               | 0.27                                   | 0.52                 | 0.71                                   | 1.38                 |
| Schkeuditz        | Rural        | 0.25                                   | 0.53                 | 0.43                                   | 0.93                 | 0.68                                   | 1.49                 |
| Carlsfeld         | Mountain     | -0.26                                  | -0.35                | (-0.12)                                | (-0.17)              | (0.00)                                 | (-0.01)              |
| Fichtelberg       | Mountain     | -0.31                                  | -0.37                | -0.37                                  | -0.45                | -0.79                                  | -0.95                |
| Schwartenberg     | Mountain     | (-0.05)                                | (-0.06)              | (0.15)                                 | (0.22)               | (0.26)                                 | (0.37)               |
| Zinnwald          | Mountain     | (-0.02)                                | (-0.03)              | (0.15)                                 | (0.22)               | (0.14)                                 | (0.20)               |

**Table S7. Trends for all available years since 1997, 15 years from 2006 to 2020 and 10 years from 2011 to 2020 of NO<sub>x</sub> (A), NO (B), NO<sub>2</sub> (C), and O<sub>x</sub> (D). Statistically non-significant values with  $p > 0.05$  are put in brackets. \* means the years begin from 2008.**

(A)

| NO <sub>x</sub>   |              | All available years                    |                      | 15 years                               |                      | 10 years                               |                      |
|-------------------|--------------|----------------------------------------|----------------------|----------------------------------------|----------------------|----------------------------------------|----------------------|
|                   |              | 1997 or later - 2020                   |                      | 2006 - 2020                            |                      | 2011 - 2020                            |                      |
| Station           | Station type | abs. Trend                             | rel. Trend           | abs. Trend                             | rel. Trend           | abs. Trend                             | rel. Trend           |
|                   |              | $\mu\text{g m}^{-3} \text{ year}^{-1}$ | % year <sup>-1</sup> | $\mu\text{g m}^{-3} \text{ year}^{-1}$ | % year <sup>-1</sup> | $\mu\text{g m}^{-3} \text{ year}^{-1}$ | % year <sup>-1</sup> |
| DD-Nord           | Traffic      | -2.96                                  | -2.57                | -3.32                                  | -3.54                | -3.83                                  | -4.77                |
| Annaberg          | Urban        | -1.66                                  | -2.46                | -1.6                                   | -2.98                | -1.56                                  | -3.42                |
| Bautzen           | Urban        | -1.13                                  | -3.09                | -1.13                                  | -3.19                | -1.32                                  | -4.27                |
| DD-Winkelmannstr. | Urban        | -0.9                                   | -2.75                | -0.90*                                 | -2.75*               | -0.9                                   | -3.03                |

|                  |          |       |       |       |       |       |       |
|------------------|----------|-------|-------|-------|-------|-------|-------|
| L-West           | Urban    | -0.57 | -1.88 | -0.58 | -2.17 | -0.75 | -3.06 |
| L-Thekla         | Urban    |       |       |       |       |       |       |
| Plauen-DWD       | Urban    |       |       |       |       |       |       |
| Zittau-Ost       | Urban    | -0.3  | -1.35 | -0.22 | -1.18 | -0.5  | -2.59 |
| Collmberg        | Rural    | -0.31 | -1.89 | -0.36 | -2.55 | -0.37 | -2.99 |
| Niesky           | Rural    | -0.24 | -2.04 | -0.24 | -2.04 | -0.15 | -1.41 |
| Radebeul-Wahnsd. | Rural    | -0.44 | -1.77 | -0.48 | -2.26 | -0.56 | -2.97 |
| Schkeuditz       | Rural    |       |       |       |       |       |       |
| Carlsfeld        | Mountain |       |       |       |       |       |       |
| Fichtelberg      | Mountain |       |       |       |       |       |       |
| Schwartenberg    | Mountain | -0.36 | -2.13 | -0.4  | -2.91 | -0.3  | -2.71 |
| Zinnwald         | Mountain | -0.4  | -2.22 | -0.46 | -3.27 | -0.32 | -2.92 |

(B)

| NO                |              | All available years                    |                      | 15 years                               |                      | 10 years                               |                      |
|-------------------|--------------|----------------------------------------|----------------------|----------------------------------------|----------------------|----------------------------------------|----------------------|
|                   |              | 1997 or later - 2020                   |                      | 2006 - 2020                            |                      | 2011 - 2020                            |                      |
| Station           | Station type | abs. Trend                             | rel. Trend           | abs. Trend                             | rel. Trend           | abs. Trend                             | rel. Trend           |
|                   |              | $\mu\text{g m}^{-3} \text{ year}^{-1}$ | % year <sup>-1</sup> | $\mu\text{g m}^{-3} \text{ year}^{-1}$ | % year <sup>-1</sup> | $\mu\text{g m}^{-3} \text{ year}^{-1}$ | % year <sup>-1</sup> |
| DD-Nord           | Traffic      | -1.22                                  | -2.93                | -1.27                                  | -4.02                | -1.49                                  | -5.53                |
| Annaberg          | Urban        | -0.65                                  | -2.78                | -0.6                                   | -3.33                | -0.7                                   | -4.61                |
| Bautzen           | Urban        | -0.29                                  | -3.46                | -0.29                                  | -3.62                | -0.31                                  | -4.59                |
| DD-Winkelmannstr. | Urban        | -0.11                                  | -2.09                | -0.11*                                 | -2.09*               | -0.15                                  | -2.96                |
| L-West            | Urban        | -0.07                                  | -1.62                | -0.05                                  | -1.34                | -0.1                                   | -2.74                |
| L-Thekla          | Urban        |                                        |                      |                                        |                      |                                        |                      |
| Plauen-DWD        | Urban        |                                        |                      |                                        |                      |                                        |                      |
| Zittau-Ost        | Urban        | -0.02                                  | -0.78                | -0.01                                  | -0.6                 | -0.1                                   | -2.98                |
| Collmberg         | Rural        | -0.01                                  | -0.44                | 0                                      | -0.18                | -0.01                                  | -0.48                |
| Niesky            | Rural        | -0.01                                  | -0.85                | -0.01                                  | -0.85                | -0.02                                  | -1.26                |
| Radebeul-Wahnsd.  | Rural        | -0.03                                  | -1.07                | -0.02                                  | -0.9                 | -0.05                                  | -2.04                |
| Schkeuditz        | Rural        |                                        |                      |                                        |                      |                                        |                      |
| Carlsfeld         | Mountain     |                                        |                      |                                        |                      |                                        |                      |

|               |          |       |       |       |       |         |         |
|---------------|----------|-------|-------|-------|-------|---------|---------|
| Fichtelberg   | Mountain |       |       |       |       |         |         |
| Schwartenberg | Mountain | -0.01 | -0.69 | -0.01 | -1.01 | -0.02   | -1.53   |
| Zinnwald      | Mountain | -0.02 | -1.24 | -0.01 | -0.99 | (-0.01) | (-0.43) |

(C)

| NO <sub>2</sub>   |              | All available years                   |                      | 15 years                              |                      | 10 years                              |                      |
|-------------------|--------------|---------------------------------------|----------------------|---------------------------------------|----------------------|---------------------------------------|----------------------|
|                   |              | 1997 or later - 2020                  |                      | 2006 - 2020                           |                      | 2011 - 2020                           |                      |
| Station           | Station type | abs. Trend                            | rel. Trend           | abs. Trend                            | rel. Trend           | abs. Trend                            | rel. Trend           |
|                   |              | µg m <sup>-3</sup> year <sup>-1</sup> | % year <sup>-1</sup> | µg m <sup>-3</sup> year <sup>-1</sup> | % year <sup>-1</sup> | µg m <sup>-3</sup> year <sup>-1</sup> | % year <sup>-1</sup> |
| DD-Nord           | Traffic      | -1.06                                 | -2.06                | -1.4                                  | -3.1                 | -1.56                                 | -3.99                |
| Annaberg          | Urban        | -0.65                                 | -2.02                | -0.69                                 | -2.61                | -0.57                                 | -2.54                |
| Bautzen           | Urban        | -0.68                                 | -2.82                | -0.68                                 | -2.95                | -0.78                                 | -3.84                |
| DD-Winkelmannstr. | Urban        | -0.63                                 | -2.65                | -0.63*                                | -2.65*               | -0.58                                 | -2.71                |
| L-West            | Urban        | -0.45                                 | -1.91                | -0.51                                 | -2.39                | -0.57                                 | -3.04                |
| L-Thekla          | Urban        |                                       |                      |                                       |                      |                                       |                      |
| Plauen-DWD        | Urban        |                                       |                      |                                       |                      |                                       |                      |
| Zittau-Ost        | Urban        | -0.26                                 | -1.5                 | -0.25                                 | -1.64                | -0.32                                 | -2.24                |
| Collmberg         | Rural        | -0.29                                 | -2.04                | -0.35                                 | -2.83                | -0.34                                 | -3.33                |
| Niesky            | Rural        | -0.21                                 | -2.25                | -0.21                                 | -2.25                | (-0.10)                               | (-1.20)              |
| Radebeul-Wahnsd.  | Rural        | -0.39                                 | -1.86                | -0.44                                 | -2.48                | -0.51                                 | -3.25                |
| Schkeuditz        | Rural        |                                       |                      |                                       |                      |                                       |                      |
| Carlsfeld         | Mountain     |                                       |                      |                                       |                      |                                       |                      |
| Fichtelberg       | Mountain     |                                       |                      |                                       |                      |                                       |                      |
| Schwartenberg     | Mountain     | -0.33                                 | -2.34                | -0.38                                 | -3.28                | -0.29                                 | -3.23                |
| Zinnwald          | Mountain     | -0.36                                 | -2.39                | -0.43                                 | -3.77                | -0.35                                 | -3.89                |

(D)

| O <sub>x</sub> | All available years  |  | 15 years    |  | 10 years    |  |
|----------------|----------------------|--|-------------|--|-------------|--|
|                | 1997 or later - 2020 |  | 2006 - 2020 |  | 2011 - 2020 |  |

| Station           | Station type | abs. Trend                             | rel. Trend             | abs. Trend                             | rel. Trend             | abs. Trend                             | rel. Trend             |
|-------------------|--------------|----------------------------------------|------------------------|----------------------------------------|------------------------|----------------------------------------|------------------------|
|                   |              | $\mu\text{g m}^{-3} \text{ year}^{-1}$ | $\% \text{ year}^{-1}$ | $\mu\text{g m}^{-3} \text{ year}^{-1}$ | $\% \text{ year}^{-1}$ | $\mu\text{g m}^{-3} \text{ year}^{-1}$ | $\% \text{ year}^{-1}$ |
| DD-Nord           | Traffic      | -0.21                                  | -0.52                  | -0.33                                  | -0.82                  | -0.26                                  | -0.68                  |
| Annaberg          | Urban        | -0.24                                  | -0.62                  | -0.23                                  | -0.63                  | (-0.09)                                | (-0.25)                |
| Bautzen           | Urban        | -0.25                                  | -0.67                  | -0.21                                  | -0.56                  | (-0.20)                                | (-0.55)                |
| DD-Winkelmannstr. | Urban        | (-0.07)                                | (-0.22)                | (-0.07) *                              | (-0.22) *              | (-0.03)                                | (-0.07)                |
| L-West            | Urban        | -0.14                                  | -0.4                   | (-0.10)                                | (-0.28)                | (-0.07)                                | (-0.21)                |
| L-Thekla          | Urban        |                                        |                        |                                        |                        |                                        |                        |
| Plauen-DWD        | Urban        |                                        |                        |                                        |                        |                                        |                        |
| Zittau-Ost        | Urban        | -0.22                                  | -0.63                  | -0.14                                  | -0.43                  | (-0.13)                                | (-0.41)                |
| Collnberg         | Rural        | -0.16                                  | -0.43                  | (-0.08)                                | (-0.24)                | -0.02                                  | -0.05                  |
| Niesky            | Rural        | (-0.13)                                | (-0.40)                | (-0.13)                                | (-0.40)                | (-0.04)                                | (-0.12)                |
| Radebeul-Wahnsd.  | Rural        | -0.17                                  | -0.45                  | -0.1                                   | -0.29                  | -0.03                                  | -0.1                   |
| Schkeuditz        | Rural        |                                        |                        |                                        |                        |                                        |                        |
| Carlsfeld         | Mountain     |                                        |                        |                                        |                        |                                        |                        |
| Fichtelberg       | Mountain     |                                        |                        |                                        |                        |                                        |                        |
| Schwartenberg     | Mountain     | -0.2                                   | -0.46                  | -0.17                                  | -0.41                  | (-0.08)                                | (-0.21)                |
| Zinnwald          | Mountain     | -0.18                                  | -0.42                  | -0.17                                  | -0.43                  | (-0.16)                                | (-0.41)                |

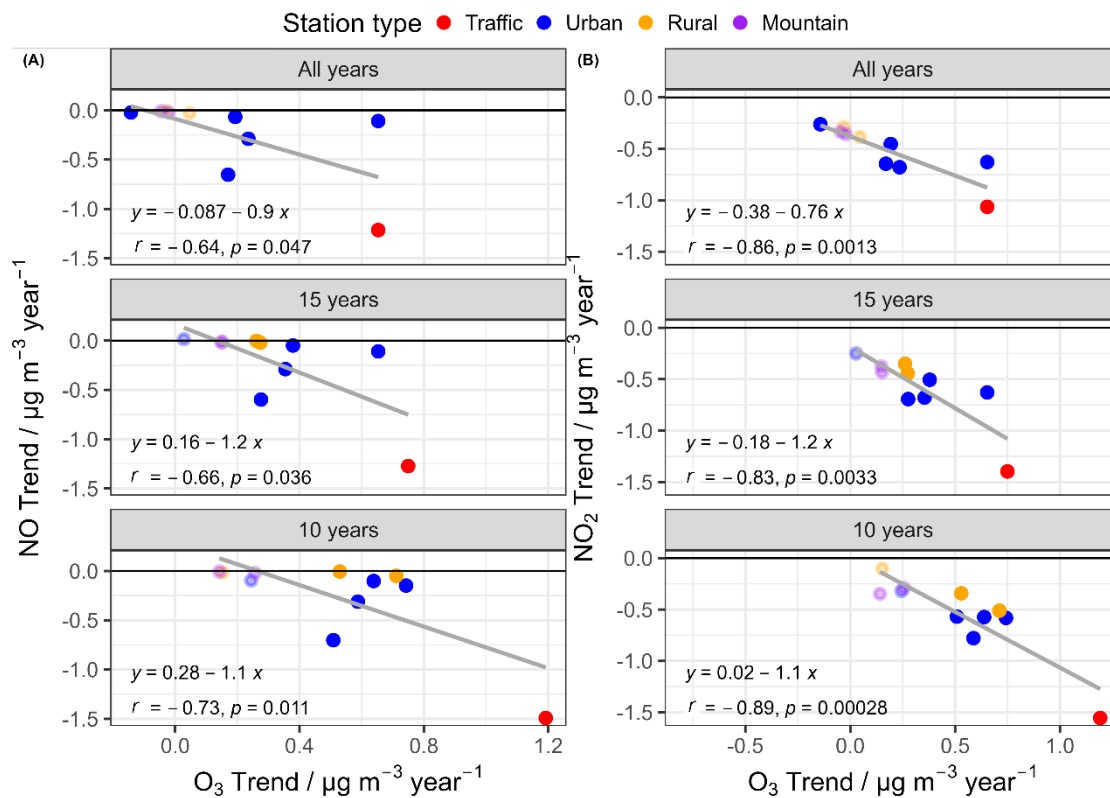

**Figure S3: Relationships between O<sub>3</sub> trends and NO, NO<sub>2</sub> trends across all stations for three different time periods. Transparent dots indicate statistically non-significant O<sub>3</sub> trends.**



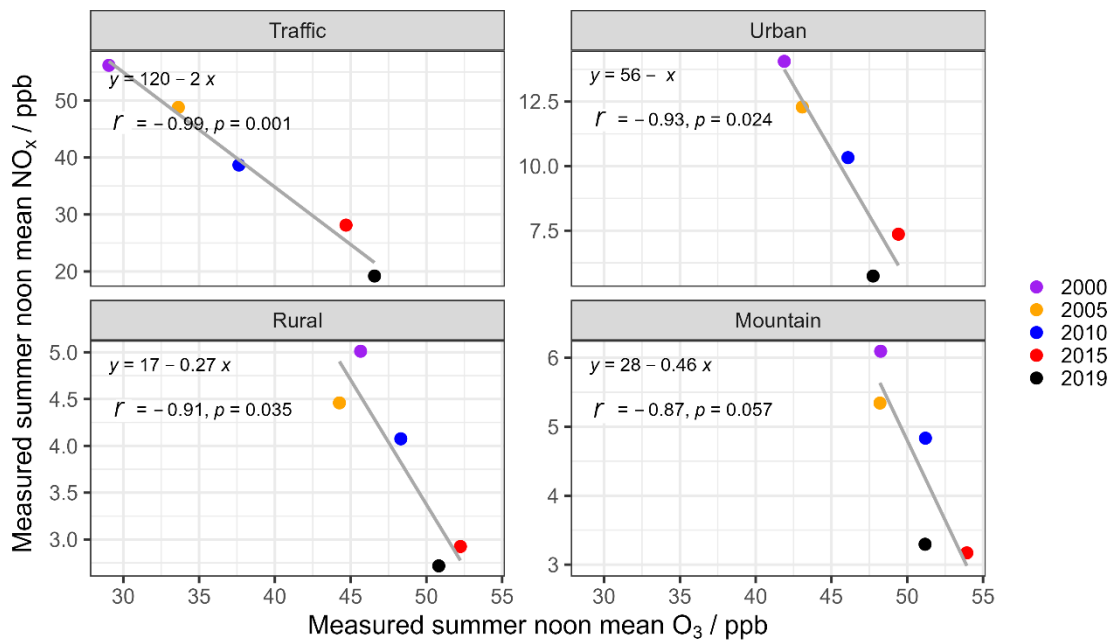

**Figure S4: Correlations between measured averaged noon (12:00 - 13:00)  $\text{NO}_x$  in ppb (~0.82 times and 0.53 times for NO and  $\text{NO}_2$ , respectively, concentrations in  $\mu\text{g m}^{-3}$ ) and  $\text{O}_3$  in ppb (~0.51 times  $\text{O}_3$  concentration in  $\mu\text{g m}^{-3}$ ) of four station types in summer over 5 years (2000, 2005, 2010, 2015 and 2019).**

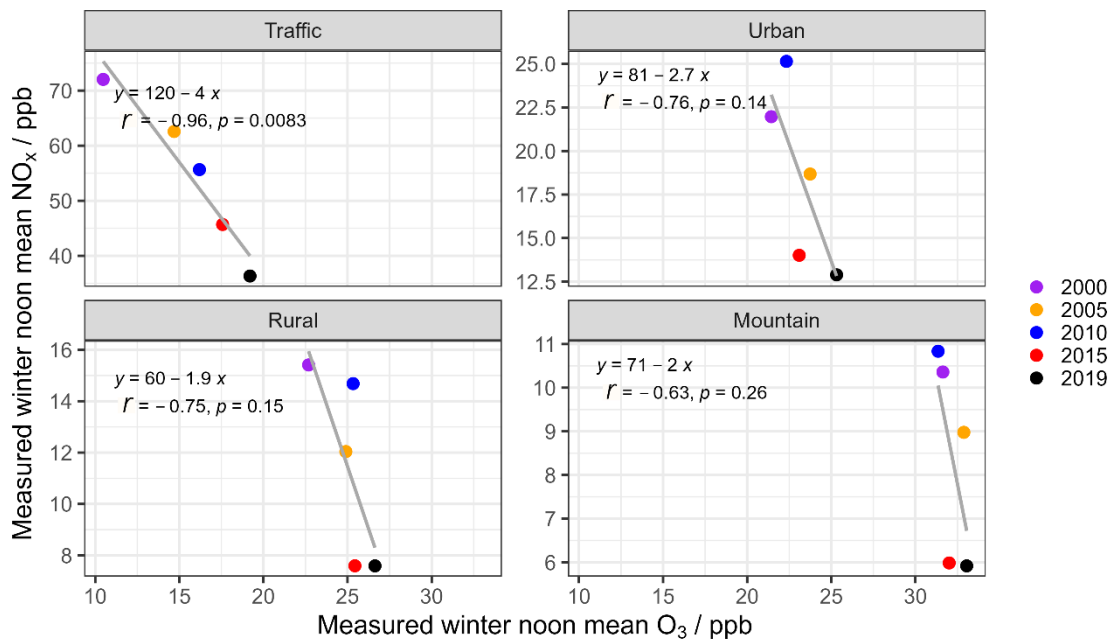

Figure S5: Correlations between measured averaged noon (12:00 - 13:00) NO<sub>x</sub> (~0.82 times and 0.53 times for NO and NO<sub>2</sub>, respectively, concentrations in µg m<sup>-3</sup>) and O<sub>3</sub> in ppb (~0.51 times O<sub>3</sub> concentration in µg m<sup>-3</sup>) of four station types in winter over 5 years (2000, 2005, 2010, 2015 and 2019).

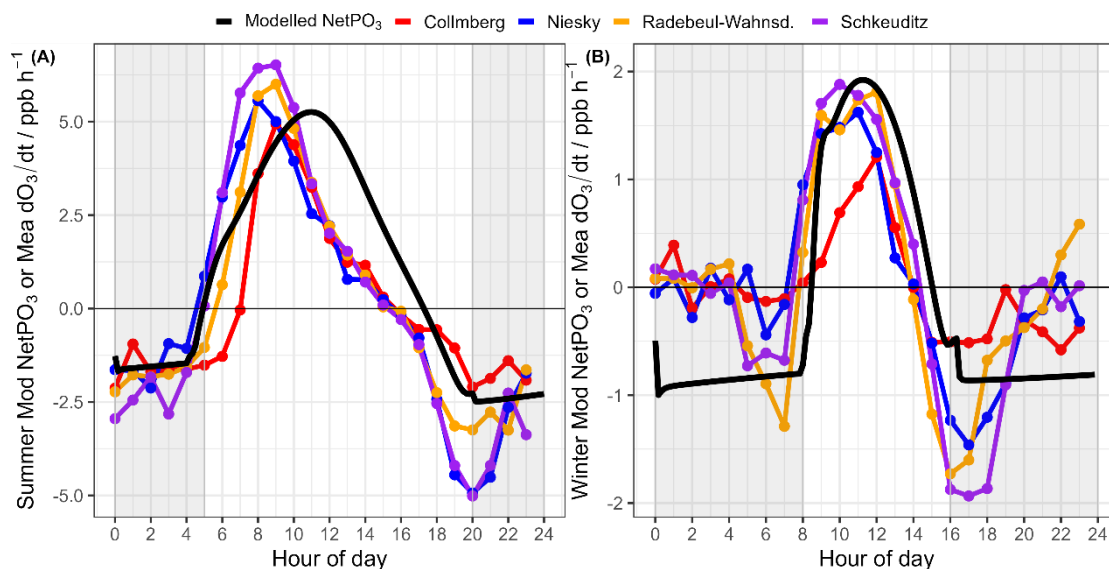

Figure S6: Diurnal profiles of the modelled net O<sub>3</sub> production rate (NetPO<sub>3</sub> in ppb h<sup>-1</sup>) and measured O<sub>3</sub> change rate (dO<sub>3</sub>/dt, ppb h<sup>-1</sup>) for summer (A) and winter (B), respectively. Linear correlation coefficient (r) between modelled and measured rates is larger than 0.8 in both seasons.

Table S8. TNMVOC concentrations for the summer scenario used to include station type data into the isopleth diagram (Fig. 10 A). These are derived from comparing measured and modelled NO<sub>x</sub>, as well as measured dO<sub>3</sub>/dt and modelled NetPO<sub>3</sub> values.

| Year | Period | Hour   | Station type | Measured        |                     | Modelled        |                     |        |
|------|--------|--------|--------------|-----------------|---------------------|-----------------|---------------------|--------|
|      |        |        |              | NO <sub>x</sub> | dO <sub>3</sub> /dt | NO <sub>x</sub> | NetPO <sub>3</sub>  | TNMVOC |
|      |        |        |              | ppb             | ppb h <sup>-1</sup> | ppb             | ppb h <sup>-1</sup> | ppb    |
| 2000 | Summer | 6 - 12 | Traffic      | 65.22           | 2.74                | 65.27           | 2.74                | 91.87  |
| 2000 | Summer | 6 - 12 | Urban        | 19.07           | 4.13                | 19.02           | 4.13                | 54.06  |
| 2000 | Summer | 6 - 12 | Rural        | 8.49            | 2.89                |                 |                     |        |
| 2000 | Summer | 6 - 12 | Mountain     | 7.15            | 1.2                 |                 |                     |        |
| 2005 | Summer | 6 - 12 | Traffic      | 59.17           | 3.69                | 59.16           | 3.69                | 90.7   |
| 2005 | Summer | 6 - 12 | Urban        | 18.27           | 4.27                | 18.22           | 4.27                | 53.8   |
| 2005 | Summer | 6 - 12 | Rural        | 7.06            | 3.45                |                 |                     |        |
| 2005 | Summer | 6 - 12 | Mountain     | 6.22            | 1.16                |                 |                     |        |
| 2010 | Summer | 6 - 12 | Traffic      | 45.62           | 3.87                | 45.65           | 3.87                | 78.79  |
| 2010 | Summer | 6 - 12 | Urban        | 15.08           | 4.63                | 15.12           | 4.63                | 52.05  |

|      |        |        |          |       |      |       |      |       |
|------|--------|--------|----------|-------|------|-------|------|-------|
| 2010 | Summer | 6 - 12 | Rural    | 5.94  | 3.42 |       |      |       |
| 2010 | Summer | 6 - 12 | Mountain | 5.53  | 1.18 |       |      |       |
| 2015 | Summer | 6 - 12 | Traffic  | 34.27 | 4.32 | 34.23 | 4.32 | 69.81 |
| 2015 | Summer | 6 - 12 | Urban    | 11.48 | 4.75 | 11.51 | 4.75 | 48.6  |
| 2015 | Summer | 6 - 12 | Rural    | 4.96  | 3.73 |       |      |       |
| 2015 | Summer | 6 - 12 | Mountain | 3.94  | 1.3  |       |      |       |
| 2019 | Summer | 6 - 12 | Traffic  | 23.87 | 4.55 | 23.82 | 4.55 | 60.64 |
| 2019 | Summer | 6 - 12 | Urban    | 9.59  | 4.88 | 9.61  | 4.87 | 46.91 |
| 2019 | Summer | 6 - 12 | Rural    | 4.54  | 3.89 |       |      |       |
| 2019 | Summer | 6 - 12 | Mountain | 3.67  | 1.64 |       |      |       |

**Table S9. TNMVOC concentrations for the winter scenario used to include station type data into the isopleth diagram (Fig. 10 B). These are derived from comparing measured and modelled NO<sub>x</sub>, as well as measured dO<sub>3</sub>/dt and modelled NetPO<sub>3</sub> values.**

| Year | Period | Hour   | Station type | Measured        |                     | Modelled        |                     |        |
|------|--------|--------|--------------|-----------------|---------------------|-----------------|---------------------|--------|
|      |        |        |              | NO <sub>x</sub> | dO <sub>3</sub> /dt | NO <sub>x</sub> | NetPO <sub>3</sub>  | TNMVOC |
|      |        |        |              | ppb             | ppb h <sup>-1</sup> | ppb             | ppb h <sup>-1</sup> | ppb    |
| 2000 | Winter | 8 - 12 | Traffic      | 80.56           | 0.78                | 80.58           | 0.78                | 178.88 |
| 2000 | Winter | 8 - 12 | Urban        | 31.48           | 1.45                | 31.43           | 1.46                | 108.46 |
| 2000 | Winter | 8 - 12 | Rural        | 16.38           | 0.97                |                 |                     |        |
| 2000 | Winter | 8 - 12 | Mountain     | 10.46           | 0.69                |                 |                     |        |
| 2005 | Winter | 8 - 12 | Traffic      | 68.96           | 0.85                | 68.97           | 0.85                | 164.34 |
| 2005 | Winter | 8 - 12 | Urban        | 23.16           | 1.22                | 23.12           | 1.22                | 92.69  |
| 2005 | Winter | 8 - 12 | Rural        | 12.87           | 0.99                |                 |                     |        |
| 2005 | Winter | 8 - 12 | Mountain     | 8.42            | 0.44                |                 |                     |        |
| 2010 | Winter | 8 - 12 | Traffic      | 63.24           | 0.98                | 63.26           | 0.98                | 157.86 |
| 2010 | Winter | 8 - 12 | Urban        | 29.75           | 1.32                | 29.73           | 1.32                | 104.25 |
| 2010 | Winter | 8 - 12 | Rural        | 15.34           | 1.30                |                 |                     |        |
| 2010 | Winter | 8 - 12 | Mountain     | 10.08           | 0.68                |                 |                     |        |
| 2015 | Winter | 8 - 12 | Traffic      | 55.01           | 1.42                | 55.06           | 1.42                | 150.5  |
| 2015 | Winter | 8 - 12 | Urban        | 20.24           | 1.61                | 20.22           | 1.61                | 93.22  |
| 2015 | Winter | 8 - 12 | Rural        | 9.11            | 1.17                |                 |                     |        |
| 2015 | Winter | 8 - 12 | Mountain     | 5.97            | 0.48                |                 |                     |        |
| 2019 | Winter | 8 - 12 | Traffic      | 43.47           | 1.59                | 43.44           | 1.59                | 131.06 |
| 2019 | Winter | 8 - 12 | Urban        | 18.16           | 1.65                | 18.12           | 1.65                | 90.94  |
| 2019 | Winter | 8 - 12 | Rural        | 8.85            | 1.17                |                 |                     |        |
| 2019 | Winter | 8 - 12 | Mountain     | 5.67            | 0.35                |                 |                     |        |

**Table S10. The species list of NMVOCs measured by online thermodesorption gas chromatography with flame ionization detection in Borna, south of Leipzig, Germany.**

| Number | Compounds              |
|--------|------------------------|
| 1      | 1-Butene               |
| 2      | 1-Hexene               |
| 3      | 1-Pentene              |
| 4      | 1,2,3-Trimethylbenzene |
| 5      | 1,2,4-Trimethylbenzene |
| 6      | 1,3-Butadiene          |
| 7      | 1,3,5-Trimethylbenzene |
| 8      | 2-Methylheptane        |
| 9      | 2-Methylhexane         |
| 10     | 2-Methylpentane        |
| 11     | 2,2-Dimethylbutane     |
| 12     | 2,2,4-Trimethylpentane |
| 13     | 2,3-Dimethylbutane     |
| 14     | 2,3-Dimethylpentane    |
| 15     | 2,3,4-Trimethylpentane |
| 16     | 2,4-Dimethylpentane    |
| 17     | 3-Methylheptane        |
| 18     | 3-Methylhexane         |
| 19     | 3-Methylpentane        |
| 20     | $\alpha$ -Pinene       |
| 21     | Acetylene              |
| 22     | $\beta$ -Pinene        |
| 23     | Benzene                |
| 24     | cis-2-Butene           |
| 25     | cis-2-Pentene          |
| 26     | Cyclohexane            |
| 27     | Cyclopentane           |
| 28     | Ethane                 |
| 29     | Ethene                 |
| 30     | Ethylbenzene           |
| 31     | i-Butane               |
| 32     | i-Butene               |
| 33     | i-Pentane              |
| 34     | i-Propylbenzene        |
| 35     | Isoprene               |
| 36     | Limonene               |
| 37     | m-Diethylbenzene       |

|    |                    |
|----|--------------------|
| 38 | m-Ethyltoluene     |
| 39 | m,p-Xylene         |
| 40 | Methylcyclohexane  |
| 41 | Methylcyclopentane |
| 42 | n-Butane           |
| 43 | n-Decane           |
| 44 | n-Dodecane         |
| 45 | n-Heptane          |
| 46 | n-Hexane           |
| 47 | n-Nonane           |
| 48 | n-Octane           |
| 49 | n-Pentane          |
| 50 | n-Propylbenzene    |
| 51 | n-Undecane         |
| 52 | o-Ethyltoluene     |
| 53 | o-Xylene           |
| 54 | p-Diethylbenzene   |
| 55 | p-Ethyltoluene     |
| 56 | Propane            |
| 57 | Propene            |
| 58 | Styrene            |
| 59 | Toluene            |
| 60 | trans-2-Butene     |
| 61 | trans-2-Pentene    |
| 62 | 1-Hexene           |
| 63 | 2,2-Dimethylbutane |
| 64 | 3-Methylpentane    |
| 65 | Butadiene          |
| 66 | n-Hexane           |

---

**Table S11. Statistical summary of total measured NMVOCs (unit in ppb) throughout the year 2022 in Borna.**

| NMVOCs | Mean | Max    |
|--------|------|--------|
| Summer | 3.55 | 29.72  |
| Winter | 6.04 | 204.55 |

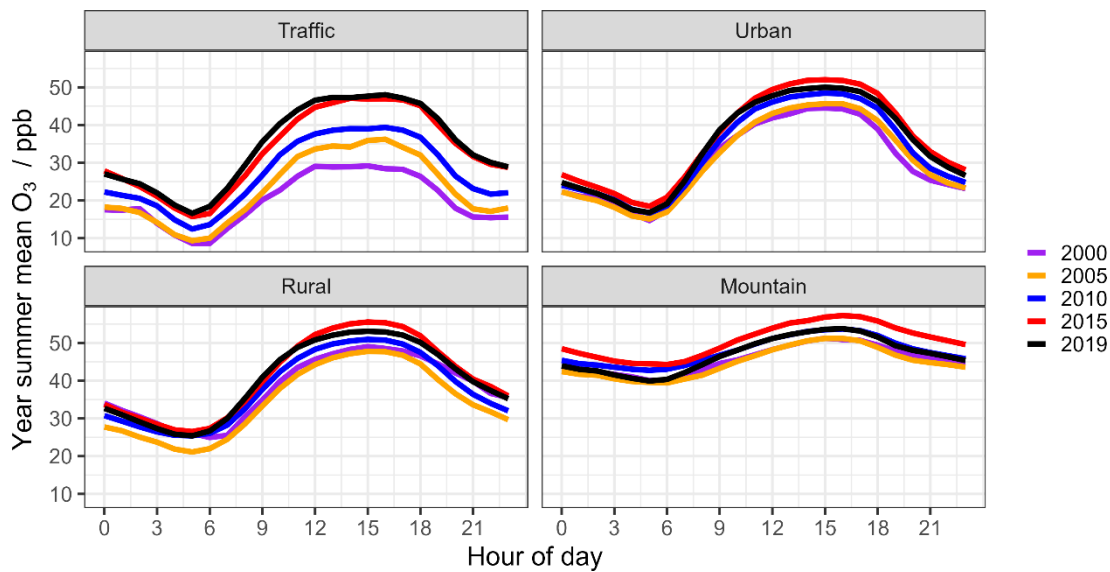

**Figure S7: Diurnal summer profiles of hourly averaged measured O<sub>3</sub> over five years (2000, 2005, 2010, 2015, and 2019) across four station types.**

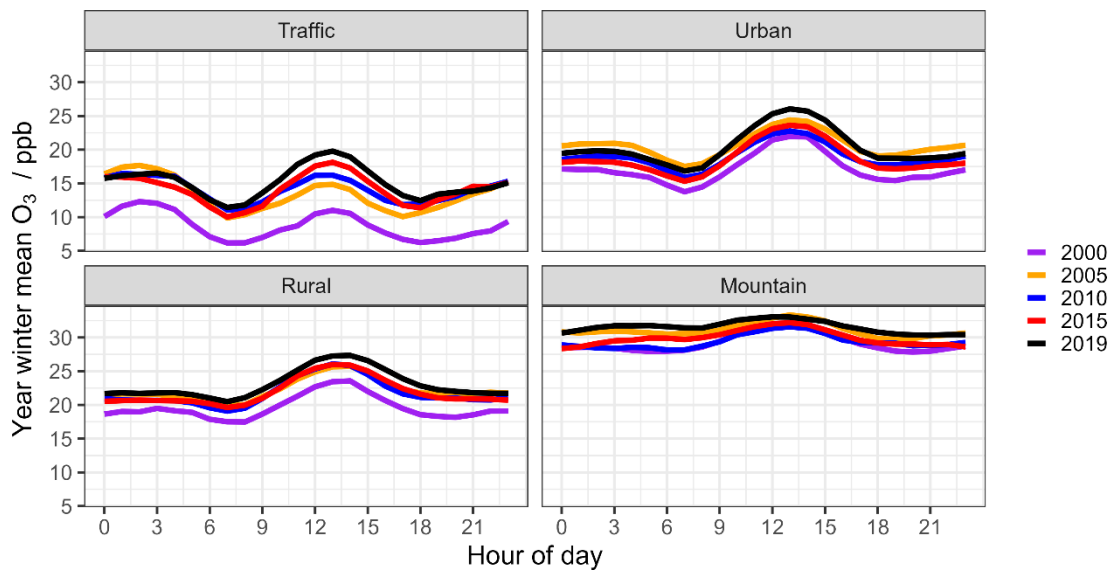

**Figure S8: Diurnal winter profiles of hourly averaged measured O<sub>3</sub> over five years (2000, 2005, 2010, 2015, and 2019) across four station types.**

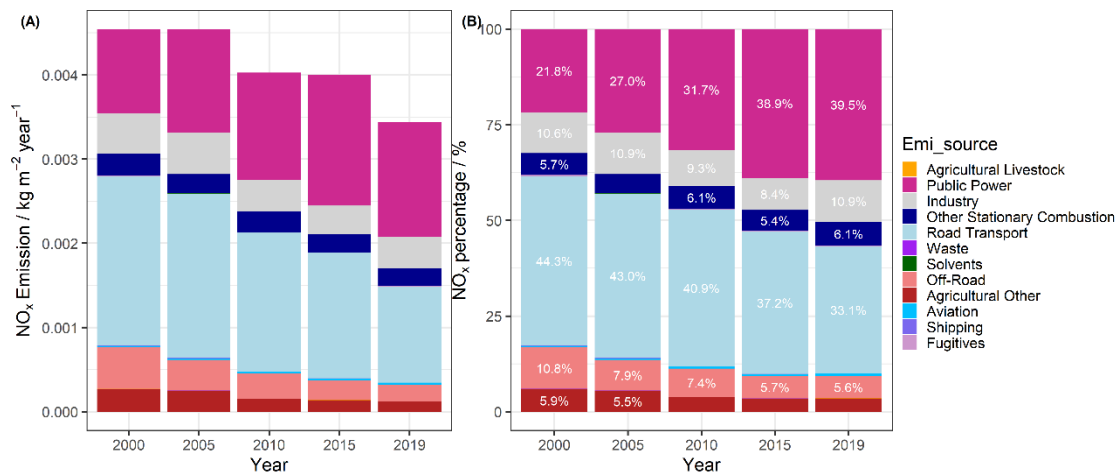

**Figure S9: Saxony anthropogenic emissions of NO<sub>x</sub>. Emission data were averaged over the selected Saxony regions (Fig. S1).**

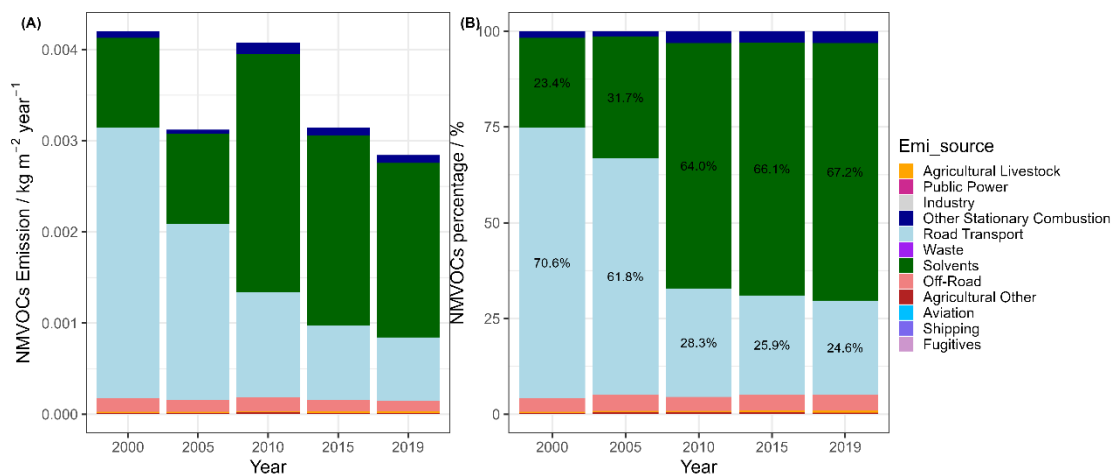

**Figure S10: Traffic anthropogenic emissions of NMVOCs. Emission data were averaged over the selected traffic area (Fig. S1).**

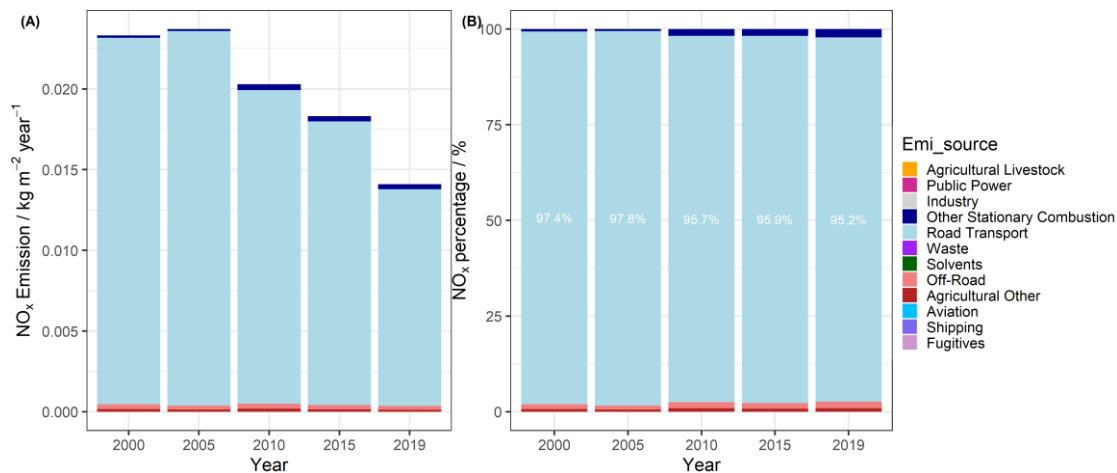

Figure S11: Traffic anthropogenic emission of NO<sub>x</sub>. Emission data were averaged over the selected traffic area (Fig. S1).

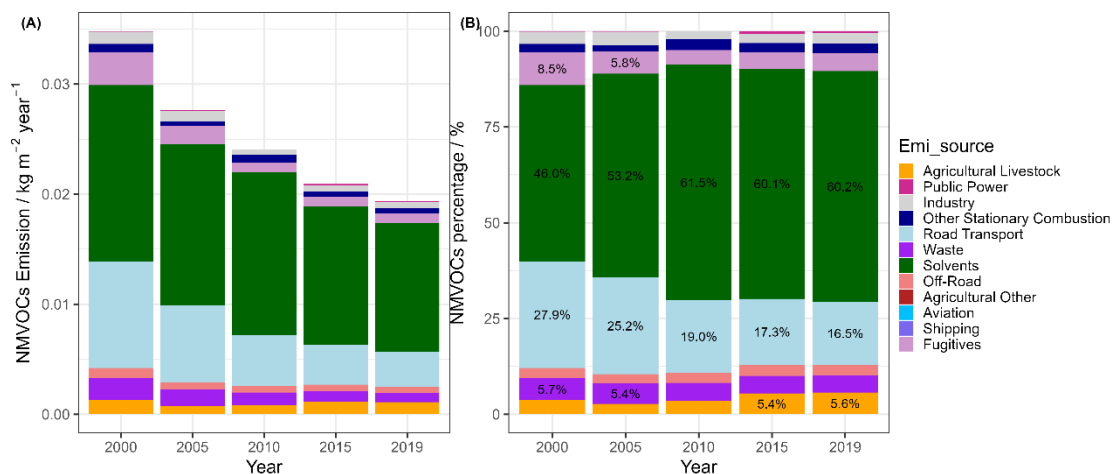

Figure S12: Leipzig urban anthropogenic emission NMVOCs. Emission data were averaged over the selected urban area (Fig. S1).



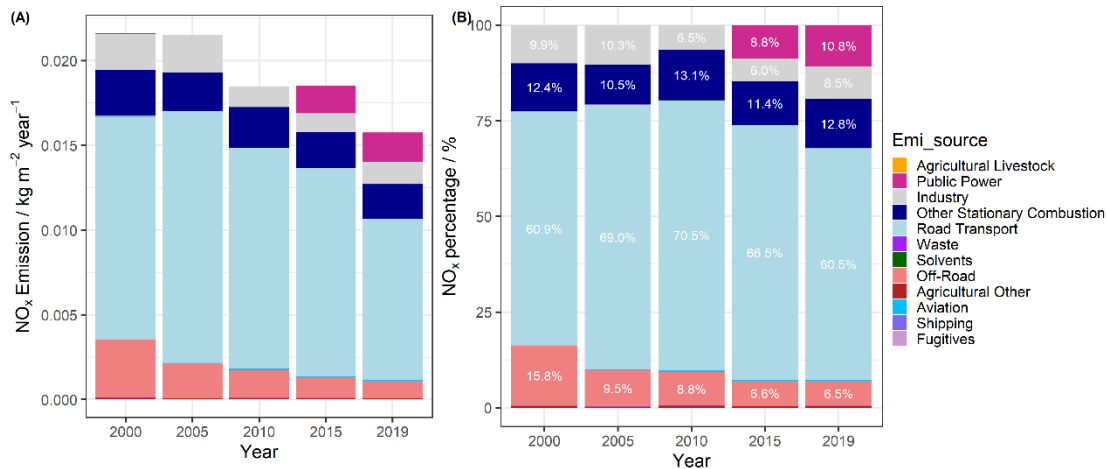

**Figure S13: Leipzig urban anthropogenic emission NO<sub>x</sub>.** Emission data were averaged over the selected urban area (Fig. S1).

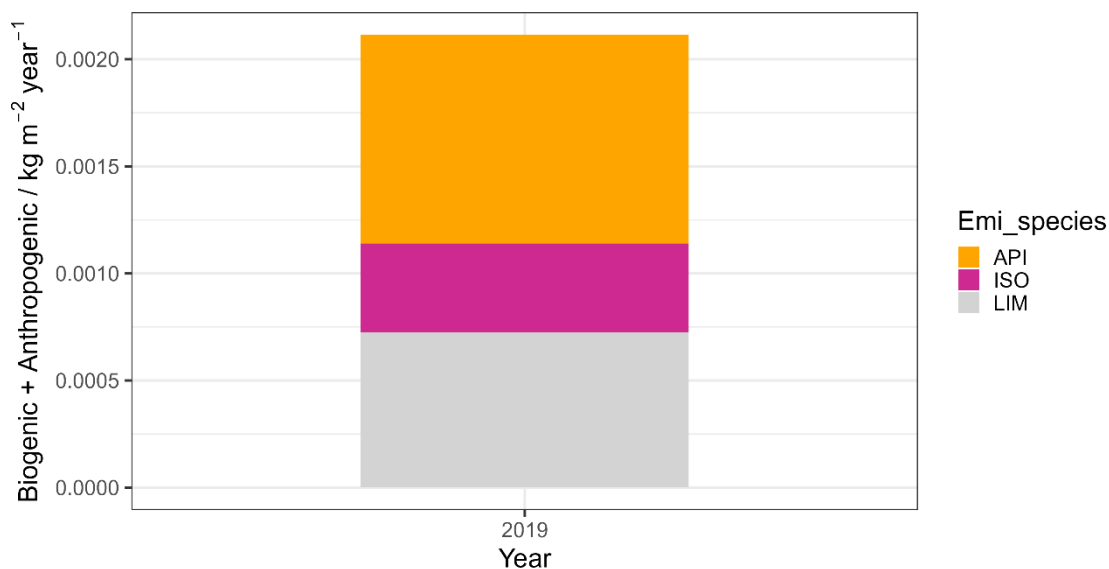

**Figure S14: Biogenic emissions of isoprene (ISO) and alpha-pinene (API) in Saxony for the year 2019, along with anthropogenic and biogenic emission data for limonene (LIM) in the same year, were averaged over the selected regions in Saxony (as shown in Fig. S1). Emission inventories in 2019 from the German Environment Agency (UBA) for Germany and Thürkow et al. (2024).**

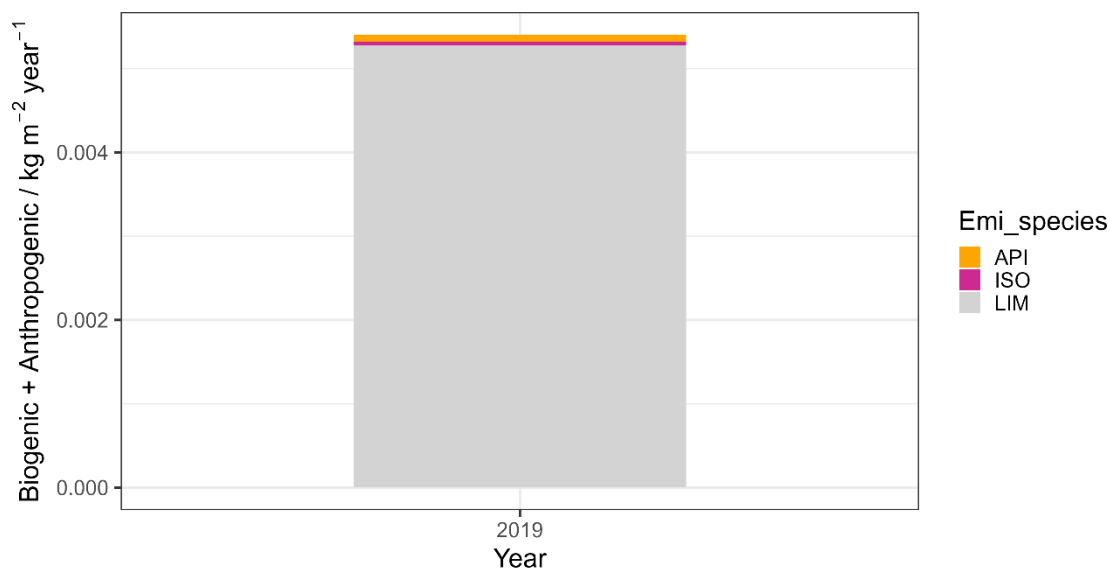

**Figure S15: Biogenic emissions of isoprene (ISO) and alpha-pinene (API) in selected Leipzig urban area (Fig. S1) for the year 2019, along with anthropogenic and biogenic emission data for limonene (LIM) in the same year. Emission inventories in 2019 from the German Environment Agency (UBA) for Germany and Thürkow et al. (2024).**

## Reference

- Clifton, O. E., Fiore, A. M., Massman, W. J., Baublitz, C. B., Coyle, M., Emberson, L., Fares, S., Farmer, D. K., Gentine, P., and Gerosa, G.: Dry deposition of ozone over land: processes, measurement, and modeling, *Reviews of Geophysics*, 58, e2019RG000670, 2020.
- Hoffmann, E. H., Tilgner, A., Vogelsberg, U., Wolke, R., and Herrmann, H.: Near-explicit multiphase modeling of halogen chemistry in a mixed urban and maritime coastal area, *ACS Earth Space Chem.*, 3, 2452-2471, 2019.
- Pandey Deolal, S., Henne, S., Ries, L., Gilge, S., Weers, U., Steinbacher, M., Staehelin, J., and Peter, T.: Analysis of elevated springtime levels of Peroxyacetyl nitrate (PAN) at the high Alpine research sites Jungfrauoch and Zugspitze, *Atmospheric Chemistry and Physics*, 14, 12553-12571, 2014.
- Rondón, A., Johansson, C., and Granat, L.: Dry deposition of nitrogen dioxide and ozone to coniferous forests, *Journal of Geophysical Research: Atmospheres*, 98, 5159-5172, 1993.
- Schaefer, H.: On the causes and consequences of recent trends in atmospheric methane, *Current Climate Change Reports*, 5, 259-274, 2019.
- Stieger, B., Spindler, G., Fahlbusch, B., Müller, K., Grüner, A., Poulain, L., Thöni, L., Seidler, E., Wallasch, M., and Herrmann, H.: Measurements of PM 10 ions and trace gases with the online system MARGA at the research station Melpitz in Germany—A five-year study, *Journal of Atmospheric Chemistry*, 75, 33-70, 2018.

- Thürkow, M., Schaap, M., Kranenburg, R., Pfäfflin, F., Neunhäuserer, L., Wolke, R., Heinold, B., Stoll, J., Lupaşcu, A., and Nordmann, S.: Dynamic evaluation of modeled ozone concentrations in Germany with four chemistry transport models, *Science of the Total Environment*, 906, 167665, 2024.
- Wu, Z., Wang, X., Turnipseed, A. A., Chen, F., Zhang, L., Guenther, A. B., Karl, T., Huey, L., Niyogi, D., and Xia, B.: Evaluation and improvements of two community models in simulating dry deposition velocities for peroxyacetyl nitrate (PAN) over a coniferous forest, *Journal of Geophysical Research: Atmospheres*, 117, 2012.
- Zellweger, C., Hüglin, C., Klausen, J., Steinbacher, M., Vollmer, M., and Buchmann, B.: Inter-comparison of four different carbon monoxide measurement techniques and evaluation of the long-term carbon monoxide time series of Jungfraujoch, *Atmospheric Chemistry and Physics*, 9, 3491-3503, 2009.
- Zhu, Y., Tilgner, A., Hoffmann, E. H., Herrmann, H., Kawamura, K., Yang, L., Xue, L., and Wang, W.: Multiphase MCM–CAPRAM modeling of the formation and processing of secondary aerosol constituents observed during the Mt. Tai summer campaign in 2014, *Atmospheric Chemistry and Physics*, 20, 6725-6747, 2020.
